# Supplementary material for: Search for stable cocrystals of energetic materials using the evolutionary algorithm USPEX
Source: Royal Society of Chemistry journal article supplement (doi:10.1039/d0cp03042b), 2020-01-01
Supplement: d0cp03042b1.pdf [file d0cp03042b1.pdf]

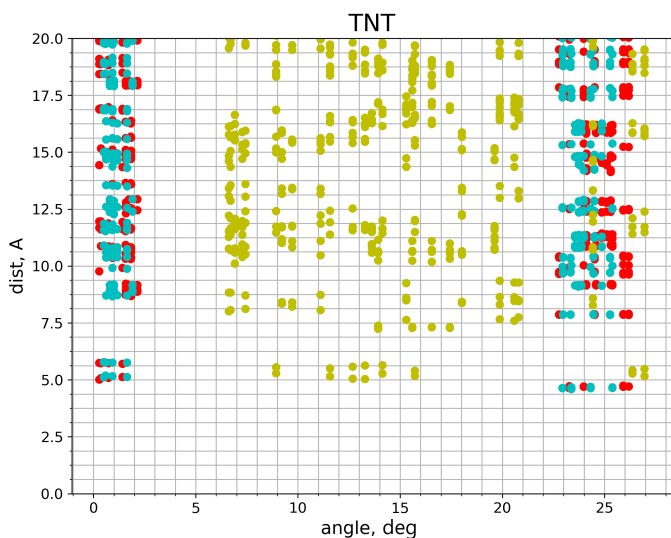

Fig. 1 Fingerprints of 3 different randomly chosen computational crystals of TNT (denoted with different colors).

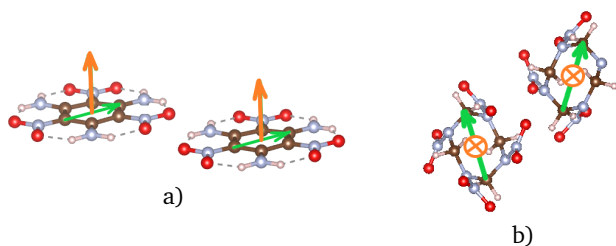

Fig. 2 Angles between vectors of identical colors are set as fingerprints for creating the energy surfaces for TATB (a) and HMX (b)

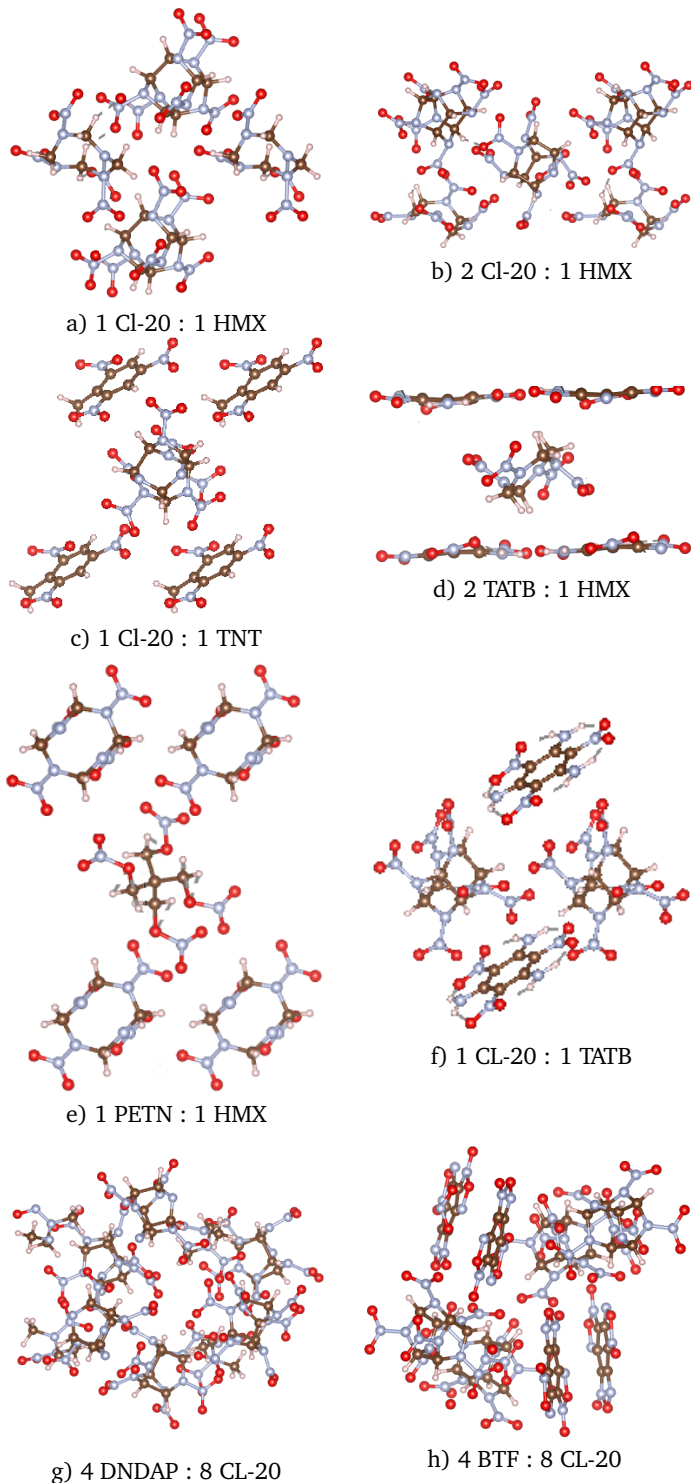

Fig. 3 Crystal structures of cocrystals of energetic materials predicted by USPEX.
